# Criticality of neuronal avalanches in human sleep and their relationship with sleep macro- and micro-architecture

Silvia Scarpetta<sup>1,2</sup>, Niccolò Morrisci<sup>3</sup>, Carlotta Mutti<sup>4</sup>, Nicoletta Azzi<sup>4</sup>,  
Irene Trippi<sup>4</sup>, Rosario Ciliento<sup>5</sup>, Ilenia Apicella<sup>2,6</sup>, Giovanni  
Messuti<sup>1,2</sup>, Marianna Angiolelli<sup>1,2</sup>, Fabrizio Lombardi<sup>7</sup>, Liborio  
Parrino<sup>4</sup>, and Anna Elisabetta Vaudano<sup>8,9</sup>

<sup>1</sup>*Department of Physics “E.R.Caianiello”, University of Salerno, I-84084 Salerno, Italy*

<sup>2</sup>*INFN, sez. di Napoli, gr. coll. Salerno, Italy*

<sup>3</sup>*Nephrology, Dialysis and transplant unit, University Hospital of Modena, I-41121  
Modena, Italy*

<sup>4</sup>*Sleep Disorders Center, Department of Medicine and Surgery, University of Parma,  
I-43121 Parma, Italy*

<sup>5</sup>*Department of Neurology, University of Wisconsin, Madison, WI-53705, USA*

<sup>6</sup>*Department of Physics, University of Naples “Federico II”, I-80126 Napoli, Italy*

<sup>7</sup>*Institute of Science and Technology Austria, A-3400 Klosterneuburg, Austria*

<sup>8</sup>*Neurology Unit, Azienda Ospedaliero-Universitaria of Modena, OCB Hospital, Modena,  
Italy*

<sup>9</sup>*Department of Biomedical, Metabolic and Neural Sciences, University of Modena and  
Reggio Emilia, I-41125 Modena, Italy*

Abbreviated title: Criticality and sleep architectures

Corresponding Authors: Silvia Scarpetta, Email: [sscarpetta@unisa.it](mailto:sscarpetta@unisa.it) ;  
Anna Elisabetta Vaudano, Email: [annavaudano@gmail.com](mailto:annavaudano@gmail.com)

Number of pages: 41; Number of figures: 6

Abstract: 250 words

Introduction: 744 words

Discussion: 1655 words

**Conflict of interest statement:** The authors declare no competing financial interests.

**Acknowledgments** FL acknowledges support from the European Union’s Horizon 2020 research and innovation program under the Marie Skłodowska-Curie Grant Agreement No. 754411, and from the Austrian Science Fund (FWF) under the Lise Meitner fellowship No. PT1013M03318. IA acknowledges financial support from the MIUR PRIN 2017WZFTZP.

35

## Abstract

36

37

38

39

40

41

42

43

44

45

46

47

48

49

50

51

52

53

54

55

56

57

58

Sleep plays a key role in preserving brain function, keeping the brain network in a state that ensures optimal computational capabilities. Empirical evidence indicates that such a state is consistent with criticality, where scale-free neuronal avalanches emerge. However, the relationship between sleep, emergent avalanches, and criticality remains poorly understood. Here we fully characterize the critical behavior of avalanches during sleep, and study their relationship with the sleep macro- and micro-architecture, in particular the cyclic alternating pattern (CAP). We show that avalanche size and duration distributions exhibit robust power laws with exponents approximately equal to  $-3/2$  and  $-2$ , respectively. Importantly, we find that sizes scale as a power law of the durations, and that all critical exponents for neuronal avalanches obey robust scaling relations, which are consistent with the mean-field directed percolation universality class. Our analysis demonstrates that avalanche dynamics depends on the position within the NREM-REM cycles, with the avalanche density increasing in the descending phases and decreasing in the ascending phases of sleep cycles. Moreover, we show that, within NREM sleep, avalanche occurrence correlates with CAP activation phases, particularly A1, which are the expression of slow wave sleep propensity and have been proposed to be beneficial for cognitive processes. The results suggest that neuronal avalanches, and thus tuning to criticality, actively contribute to sleep development and play a role in preserving network function. Such findings, alongside characterization of the universality class for avalanches, open new avenues to the investigation of functional role of criticality during sleep with potential clinical application.

59 **Significance statement.** We fully characterize the critical behavior of neu-  
60 ronal avalanches during sleep, and show that avalanches follow precise scaling laws  
61 that are consistent with the mean-field directed percolation universality class. The  
62 analysis provides first evidence of a functional relationship between avalanche oc-  
63 currence, slow-wave sleep dynamics, sleep stage transitions and occurrence of CAP  
64 phase A during NREM sleep. Because CAP is considered one of the major guardians  
65 of NREM sleep that allows the brain to dynamically react to external perturbation  
66 and contributes to the cognitive consolidation processes occurring in sleep, our ob-  
67 servations suggest that neuronal avalanches at criticality are associated with flexible  
68 response to external inputs and to cognitive processes, a key assumption of the crit-  
69 ical brain hypothesis.

## 70 **1 Introduction**

71 Sleep is an active and dynamic complex process regulated by mechanisms that guide  
72 the alternation of non-Rapid Eye Movement (NREM) and REM sleep across the  
73 night. Physiologically, sleep macro-architecture is characterized by the concentration  
74 of deep slow wave sleep (SWS) (stage N3) in the first half of the night, and the  
75 dominance of light sleep (mainly N2) and REM sleep in the second half of the night,  
76 a balanced skewness modulated by the homeostatic process and by the REM-off and  
77 REM-on systems (Brown et al., 2012). Throughout the night numerous transitions  
78 among these sleep stages occur, and, within sleep stages, micro-states on the scale  
79 of seconds and minutes are observed.

80 The cyclic alternating pattern (CAP) is one of the major adaptive components of  
81 NREM sleep. According to Terzano et al (Terzano et al., 2000), CAP is a periodic  
82 EEG activity of NREM sleep characterized by repeated spontaneous phases of EEG  
83 activation (A phase) and subsequent phases of return to background activity (B  
84 phase), evolving in a cycling pattern. Based on the distribution of slow and fast  
85 EEG frequencies, the A phases of CAP are classified in three subtypes: A1, A2 and  
86 A3 (Terzano et al., 2002). These CAP subtypes are not randomly distributed along  
87 the night, but instead their appearance is linked with the homeostatic, ultradian  
88 and circadian mechanisms of sleep regulation (Parrino et al., 1993; Terzano et al.,  
89 2005). In particular, subtypes A1 are the expression of slow wave sleep propensity  
90 and follow the exponential decline of the homeostatic process. A covariance between  
91 A1 subtypes and sleep slow wave activity (SWA) has been proposed and the two  
92 electroencephalographic elements likely share the beneficial effect on sleep-related  
93 cognitive processes (Ferri et al., 2008; Aricò et al., 2010). Furthermore, both CAP-  
94 A1 subtype and SWA are involved in the build-up and maintenance of deep NREM  
95 sleep, acting as protectors for sleep continuity (Terzano et al., 2000; Parrino and  
96 Vaudano, 2018).

97 Spontaneous alternation of transient, synchronized active and quiescent periods  
98 is typical of systems that self-organize near a critical point of a non-equilibrium  
99 phase transition (Scarpetta and de Candia, 2014; Munoz, 2018; Lombardi et al.,  
100 2020b). Following a number of theoretical and numerical results (Cragg and Tem-  
101 perley, 1954; Crutchfield and Karl, 1990; Bak, 1996; Kinouchi and Copelli, 2006),  
102 it has been hypothesized that the brain self-organizes to criticality to maximize

103 information processing and computational capabilities, and thus achieve optimal  
104 functional performance. This hypothesis is supported by empirical observations of  
105 neuronal avalanches — cascades of neural activity exhibiting power-law size and  
106 duration distributions— and long-range spatio-temporal correlations in neural ac-  
107 tivity across species, systems, and spatial scales (Linkenkaer-Hansen et al., 2001;  
108 Beggs and Plenz, 2003; Pasquale et al., 2008; Mazzoni et al., 2007; Petermann et al.,  
109 2009; Tagliazucchi et al., 2012; Palva et al., 2013; Ponce-Alvarez et al., 2018; Tkačik  
110 et al., 2015; Lombardi et al., 2021b; Mariani et al., 2021). In particular, presence  
111 of power law distributions indicates absence of characteristic temporal and spatial  
112 scales in the underlying dynamics, as observed at criticality.

113 Empirical evidence shows that neuronal avalanches during sleep exhibit power  
114 law size and duration distributions (Priesemann et al., 2013; Bocaccio et al., 2019;  
115 Allegrini et al., 2015), and that sleep may play an active role in tuning the brain to  
116 criticality (Meisel et al., 2017, 2013). At the same time, recent studies demonstrated  
117 that bursts of dominant cortical rhythms exhibit the hallmarks of self-organized criti-  
118 cal dynamics across the sleep-wake cycle, suggesting that criticality could be essential  
119 mechanism for spontaneous sleep-stage and arousals transitions (Wang et al., 2019;  
120 Lombardi et al., 2020a). However, both the nature of the alleged criticality during  
121 sleep and the relationship between related avalanche dynamics and complex sleep  
122 macro- and micro-architecture—in particular the CAP—remain poorly understood.  
123 On the one hand, the scaling relations among exponents that are expected to hold at  
124 criticality have not been verified, and a general framework to understand criticality  
125 during sleep is currently missing. On the other hand, the dynamics of avalanches in

126 connection with the highly variable and distinct states composing long- and short-  
127 term sleep cycles has not been studied, and the potential functional role of avalanches  
128 in sleep regulation has not been explored.

129     Herein, we fully characterize the critical behavior of neuronal avalanches dur-  
130 ing sleep, and determine the scaling relations that connect their critical exponents,  
131 showing that they are consistent with a specific universality class. We then study  
132 how avalanche dynamics interacts with the ascending and descending slope of the  
133 NREM-REM sleep cycles, and within NREM sleep, how the CAP phases couple  
134 with avalanche occurrence. Our analysis shows that avalanche dynamics is closely  
135 linked to NREM-REM sleep cycles across night sleep, and that neuronal avalanche  
136 occurrence correlates with the activation phase of the CAP. The results indicate that  
137 avalanches play an active role in sleep development, and point to a peculiar relation-  
138 ship between CAP, brain tuning to criticality during sleep, and cognitive processes.

## 139 **2 Materials and Methods**

### 140 **2.1 Participants**

141 The data analyzed in this study were extracted from overnight polysomnographic  
142 (PSG) recordings acquired from the Parma (Italy) Sleep Disorders Center database.  
143 Ten healthy subjects, 5 males and 5 females, mean aged 39,6 years (age range 28-  
144 53), were selected after the accomplishment of an entrance investigation. Subjects  
145 were selected based on the following inclusion criteria: (i) absence of any psychiatric,  
146 medical and neurological disorder (ii) normal sleep/wake habits without any diffi-

147 culties in falling or remaining asleep at night: a personal interview integrated by a  
148 structured questionnaire confirmed good daytime vigilance level; (iii) no drug intake  
149 at the time of PSG and the month before; (iv) full night unattended PSG recordings  
150 performed with EOG (2 channels), EEG [Ag/AgCl electrodes placed according to the  
151 10 - 20 International System referred to linked-ear lobes]. Recording electrodes were  
152 19 (Fp2, F4, C4, P4, O2, F8, T4, T6, Fz, Cz, Pz, Fp1, F3, C3, P3, O1, F7, T3, T5)  
153 in seven subjects and 25 in the remaining three: (CP3, CP4, C5, C6, C2, C1, FC4,  
154 FC3, F4, C4, P4, O2, F8, T4, T6, Fz, Cz, Pz, F3, C3, P3, O1, F7, T3, T5), EMG of  
155 the submentalis muscle, ECG, and signal for SpO<sub>2</sub> (pulse-oximetry O<sub>2</sub>-saturation).  
156 PSG recordings were acquired using a Brain Quick Micromed System 98 (Micromed,  
157 SPA). A calibration of 50  $\mu$ V was used for EEG channels with a time constant of 0.1  
158 s and a low-pass filter with 30 Hz cut-off frequency. EEG sampling rate was 256 Hz  
159 for six subjects while for the remaining four cases, one was recorded using a sampling  
160 rate of 128 Hz (subject #1) and the remaining three (subject #2, #3, #4) using 512  
161 Hz. Each signal was recorded and examined by an expert clinician (CM, IT, LP).  
162 Analysis of sleep recordings (see Section 2.2) was performed with Embla RemLogic  
163 Software. The institutional Ethical Committee Area Vasta Emilia Nord approved  
164 the study (protocol nr. 19750).

## 165 **2.2 Sleep analysis**

166 **Analysis of sleep macro-architecture.** Sleep was scored visually in 30-s epochs  
167 using standard rules according to the American Academy of Sleep Medicine (AASM)  
168 criteria (Berry et al., 2017). Conventional PSG parameters included total time in bed

169 (TIB) (minutes), total sleep time (TST) (minutes), sleep latency (minutes), rapid  
170 eye movement (REM) latency (minutes), sleep efficiency (%), wake after sleep onset  
171 (WASO) (minutes), as well as percentage of NREM (N1, N2, N3) and REM stages.

172 **Analysis of sleep micro-architecture.** Sleep micro-architecture evaluation refers  
173 to the quantification of CAP parameters based on the published international atlas  
174 (Terzano et al., 2002), and was manually performed using Embla REM-logic software  
175 by somnologists with strong expertise in the field (LP, CM). CAP is a global EEG  
176 phenomenon involving extensive cortical areas, thus CAP phases should be visible on  
177 all or most EEG leads. CAP is characterized by the alternation of phase A (transient  
178 electrocortical events) and phase B (low voltage background), both lasting between  
179 2 and 60 seconds. According to published criteria (Terzano et al., 2002) phase A  
180 activities were classified into three subtypes:

- 181 1. **Subtype A1.** EEG synchrony is the predominant activity and the EEG desyn-  
182 chrony occupies  $< 20\%$  of the whole phase A. Subtype A1 may include delta  
183 burst, K-complex sequences, vertex sharp transients, polyphasic bursts with  
184  $< 20\%$  of EEG desynchrony.
- 185 2. **Subtype A2.** It is a mixture of fast and slow rhythms where the EEG desyn-  
186 chrony occupies  $20 - 50\%$  of the entire phase A. This subtype includes polypha-  
187asic bursts with  $20 - 50\%$  of EEG desynchrony.
- 188 3. **Subtype A3.** EEG desynchrony is the predominant activity ( $> 50\%$ ) of the  
189 phase A. Subtype A3 includes K-alpha, EEG arousal and polyphasic bursts  
190 with  $> 50\%$  of EEG desynchrony.



191 The percentage of NREM sleep occupied by CAP sequences defines the CAP rate.  
192 The absence of CAP for more than 60 seconds is scored as non-CAP, and represents  
193 the portion of NREM sleep characterized by a sustained physiologic stability. CAP  
194 sequences usually precede sleep stage transitions, and, specifically, subtypes A2 and  
195 A3 typically assist the shift from NREM to REM sleep. Under physiologic circum-  
196 stances, CAP is not present during REM sleep. The following CAP variables were  
197 measured:

- 198 (i) Total CAP time in minutes (total CAP time in NREM sleep),
- 199 (ii) CAP rate (the ratio of CAP time over total NREM sleep time),
- 200 (iii) Number and duration of CAP cycles,
- 201 (iv) Number and duration of each phase A subtype (A1, A2, A3),
- 202 (v) Total number of phase A (derived by the sum of A1, A2, and A3),
- 203 (vi) Duration of phase A and B in seconds.

## 204 **2.3 Neuronal avalanche analysis**

205 Before performing avalanche analysis, waking and motion artifact segments during  
206 nocturnal sleep were manually identified and removed. Artifact-free EEG signals  
207 were z-score normalized to have zero mean and unit standard deviation (SD). To  
208 capture the spatio-temporal organization in avalanches of transient EEG events dur-  
209 ing sleep, we investigated clusters of large deflections of the artifact-free EEG signals.

210 For each EEG channel, large positive or negative excursions beyond a threshold  $\theta = \pm$   
211 nSD were identified.

212 To define the threshold  $\theta$ , we analyzed the distribution of EEG amplitudes (Fig.  
213 1B). A Gaussian distribution of amplitudes is expected to arise from a superposition  
214 of many uncorrelated sources. Conversely, EEG amplitude distributions deviate from  
215 a Gaussian shape, indicating presence of spatio-temporal correlations and collective  
216 behaviors involving different cortical areas (Fig. 1). The comparison of the signal  
217 distribution to the best Gaussian fit indicates that the two distributions start to  
218 deviate from one another around  $\theta = \pm 2$  SD (Fig. 1). Thus, thresholds smaller than  
219 2 SD would lead to the detection of many events related to noise in addition to real  
220 events whereas much larger thresholds will miss many of the real events. To avoid  
221 noise-related events while preserving most of relevant events, in this study we used  
222 a threshold value  $\theta = \pm 2$  SD. Importantly, avalanche distributions are robust for a  
223 wide range of threshold values  $> 2$  SD (Supplementary Material, Fig. S1).

224 An avalanche was defined as a continuous time interval in which there is at least  
225 one excursion beyond threshold in at least one EEG channel (Fig. 1). Avalanches  
226 are preceded and followed by time intervals with no excursions beyond threshold  
227 on any EEG channel (Beggs and Plenz, 2003; Meisel et al., 2013). The size of an  
228 avalanche,  $s$ , was defined as the sum over all channels of the absolute values of the  
229 signals exceeding the threshold.

230 To characterize the relationship between the avalanche dynamics and the sleep  
231 macro-architecture, we calculate for each subject the avalanche density as a function  
232 of time, i.e. the fraction of time occupied by avalanches, measured as

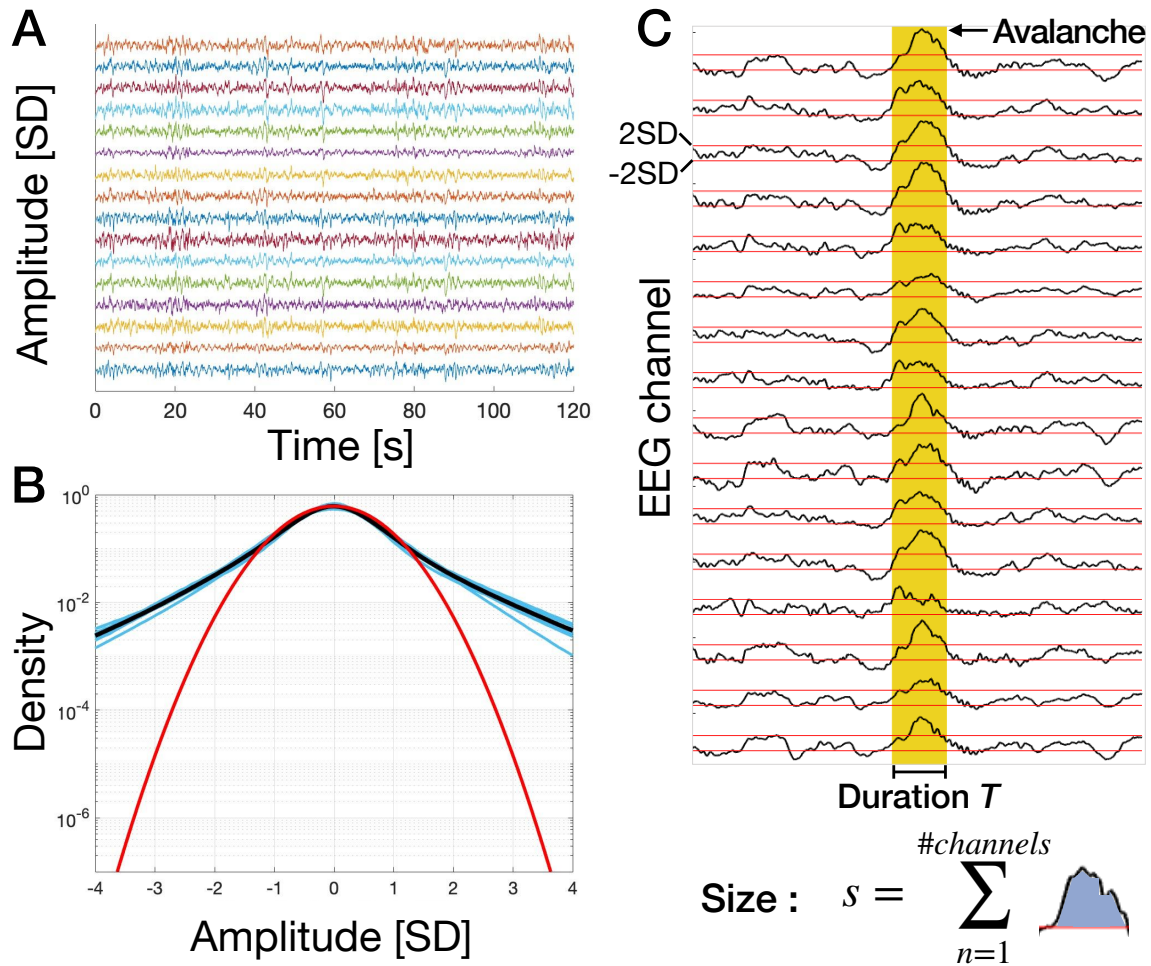

Figure 1: **Identification of neuronal avalanches and definition of avalanche size and duration.** (A) Segments (2 hours) of Z-score normalized EEG signal traces for an individual subject. Each trace correspond to an EEG channel. (B) Probability density of the z-score normalized EEG signal amplitude. The cyan curves in the background are the probability densities for all individual subjects ( $n = 10$  subjects; for each subject we pooled all individual EEG channels). The black curve is the grand average over all subjects. The red curve is the best Gaussian fit for the grand average. We notice that the empirical probability density starts deviating from the Gaussian fit around  $\pm 2$  SD. (C) A neuronal avalanche is defined as a continuous sequence of signal excursions beyond threshold (red thick line) on one or more EEG channels (upper panel). An avalanche is preceded and followed by periods in which EEG signal are below the threshold in all channels. The size of an avalanche is defined as the sum over all channels of the absolute values of the signals exceeding the threshold (bottom panel).

$$F_{av}(t) = \frac{u_{av}(t)}{u_0} \quad (1)$$

233 where  $u_{av}(t)$  is the amount of time occupied by avalanches in a sliding window of  
 234 length  $T$  (sliding step =  $1/(\text{sampling frequency})$ ), and  $u_0 = T$ . The window length

235 T has been chosen equal to 10 seconds ( $T = 10$  s) as this is the order of magnitude  
236 of the largest avalanches in our recordings.

To characterize the relationship between the avalanche dynamics and the sleep micro-architecture, we compute the Pearson correlation coefficient between the avalanche occurrence and the CAP measures, on a time scale dictated by the sampling rate of the recordings. Given the binary values  $x_i = 0, 1$ ,  $y_i = 0, 1$ , where  $x_i = 1$  indicates the presence in the sample  $i$  of an ongoing avalanche, and  $y_i = 1$  indicates presence of a particular feature of the CAP framework (CAP, NCAP, subtypes A1, A2, A3, all A phases, phases B), we compute the Pearson correlation coefficient as:

$$\rho_{x,y} = \frac{\sum_i^N (x_i - \bar{x})(y_i - \bar{y})}{\sqrt{\sum_i^N (x_i - \bar{x})^2} \sqrt{\sum_i^N (y_i - \bar{y})^2}} \quad (2)$$

237 where  $\bar{x} = \sum_i^N x_i/N$  and  $N$  is the number of samples in the sleep recordings. Being  
238 binary values, the Pearson correlation coefficient is equivalent to the  $\phi$  coefficient.  
239 The Pearson correlation coefficient has been also evaluated between avalanche oc-  
240 currence and sleep stages using Eq. 2, where  $x_i = 1$  indicates the presence ( $x_i = 0$   
241 absence) in the sample  $i$  of an ongoing avalanche, and  $y_i = 1$  indicates presence  
242 ( $y_i = 0$  absence) of a particular sleep stage (REM, N1, N2, N3).

## 243 **2.4 Statistical analysis**

244 Maximum likelihood estimation of power law exponents for avalanche size and dura-  
245 tion distributions was performed using the Power law Python package (Alstott et al.,  
246 2014). The power law fit minimized the Kolmogorov-Smirnov distance between orig-

247 inal and fitted values,  $D = \sup_x |F_{data}(x) - F_{fit}(x)|$ , where  $F_{data}$  is the empirical cu-  
248 mulative distribution function (CDF) and  $F_{fit}$  the fitted CDF. The power law fit was  
249 compared to an exponential fit by evaluating the log-likelihood ratio  $R = \ln L_p / L_e$ ,  
250 where  $L_{p,e} = \prod_{i=1}^n p_{p,e}(x_i)$  is the likelihood.  $R$  is positive if the data are more likely  
251 to follow a power law distribution, and negative if the data are more likely to follow  
252 exponential distribution. The statistical significance for  $R$  ( $p$ -value) was estimated in  
253 the Power law Python package (Alstott et al., 2014). For further details see (Clauset  
254 et al., 2009). Pairwise comparisons in Fig. 5 and 6 were conducted using Students  
255 two-tailed t-test performed in Matlab (Mathworks).

## 256 **3 Results**

### 257 **3.1 Critical exponents and scaling relations for neuronal** 258 **avalanches during sleep**

259 To characterize cortical dynamics underlying sleep macro-architecture and sleep  
260 micro-architecture, we identify neuronal avalanches and investigate signatures of crit-  
261 icality across the entire sleep period. To this end, we compute the distribution of  
262 avalanche sizes,  $P(s)$ , and avalanche durations,  $P(T)$ . In Fig. 2 we show the dis-  
263 tributions  $P(s)$  and  $P(T)$  for all subjects. We find that both the size and duration  
264 distributions are well described by a power law,  $P(s) \propto s^{-\tau}$  and  $P(T) \propto T^{-\alpha}$ , respec-  
265 tively. In both distributions the power law regime is followed by an exponential cutoff  
266 (Fig. 2). Power laws are the hallmark of criticality, and imply absence of character-  
267 istic scales in the underlying dynamics (Stanley, 1971). In this context, the observed

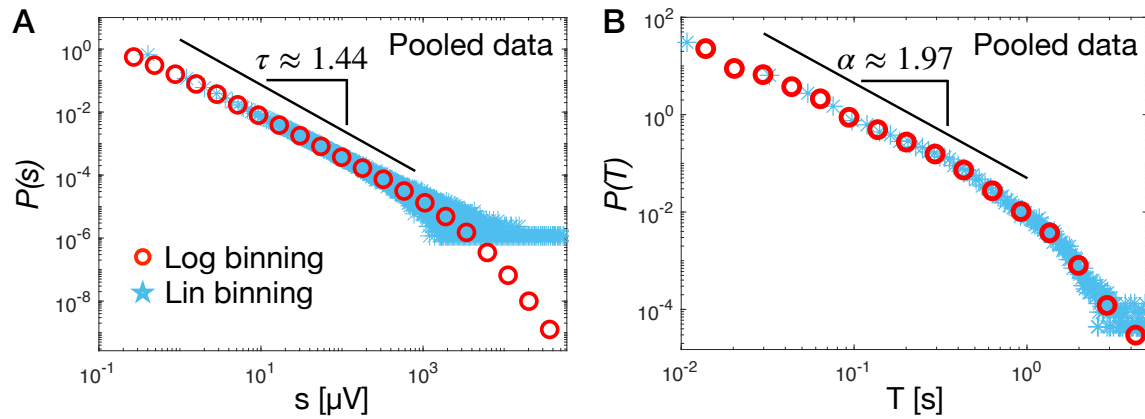

**Figure 2: Avalanche size and duration distributions exhibit a robust power law behavior during sleep periods.** (A) The distribution of avalanche sizes (red circles) follows a power law with exponent  $\tau = 1.438 \pm 0.001$  (fit  $\pm$  std. error on the fit; pooled data, 10 subjects). The power law regime is followed by an exponential cut off. The Kolmogorov-Smirnov distance between data and fit is  $D = 0.1$ , while the log-likelihood ratio between the power law and the exponential fit is  $R = 295$  ( $p < 10^{-5}$ ). (B) The distribution of avalanche duration follows a power law with exponent  $\alpha = 1.973 \pm 0.002$  (fit  $\pm$  std. error on the fit), followed by an exponential cutoff (pooled data, 10 subjects). The Kolmogorov-Smirnov distance between the data and the fit is  $D = 0.07$ . The log-likelihood ratio between the power-law and the exponential fit is  $R = 95$  ( $p < 10^{-5}$ ). Maximum likelihood estimation of the power law exponents were performed using the Powerlaw Python package (Alstott et al., 2014) over the range of values indicated by the thick black lines.

268 power law distributions indicate that neuronal avalanches have no characteristic size  
 269 and duration, namely they are scale-free. Our analysis shows that the exponent  $\tau$   
 270 for the size distribution is close to  $3/2$  ( $\tau = 1.438 \pm 0.001$ ) (fit  $\pm$  error on the fit),  
 271 while the exponent  $\alpha$  for the duration distribution is close to 2 ( $1.973 \pm 0.002$ ). We  
 272 compared the power law with an exponential fit by evaluating the log-likelihood ratio  
 273  $R = \ln \frac{L_p}{L_e}$  between the likelihood  $L_p$  for the power law and  $L_e$  for the exponential  
 274 fit (Materials and Methods). We found  $R = 295$  for the size and  $R = 95$  ( $p$ -value  
 275  $< 10^{-5}$ ; see Materials and Methods) for the duration distribution, indicating that  
 276 the respective power laws better describe the empirical distributions. Importantly,  
 277 we observe that the power law exponents  $\tau$  and  $\alpha$  are robust and weakly depend on  
 278 the scale of analysis (Fig. S1)—e.g. the threshold used to identify avalanches—,  
 279 and are consistent across subjects (Fig. 3). In Fig. 3 we show the avalanche size

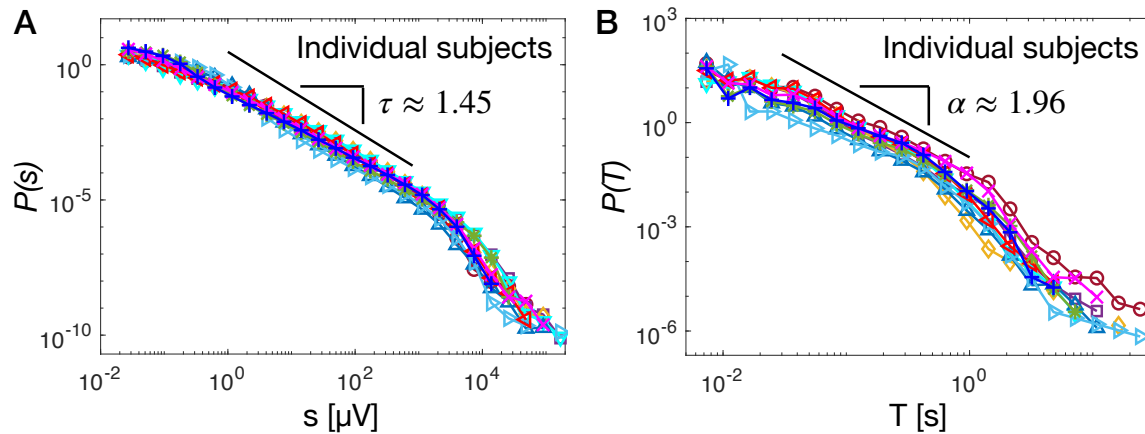

**Figure 3: Avalanche size and duration distributions consistently follow a power law behavior during sleep periods across individual subjects.** (A) The distribution of avalanche sizes follows a power law with exponent  $\tau = 1.45 \pm 0.09$  (mean  $\pm$  SD). The power law regime is followed by an exponential cut off in all individual subjects. (B) The distribution of avalanche duration follows a power law with exponent  $\tau = 1.96 \pm 0.16$  (mean  $\pm$  SD), followed by an exponential cutoff. For each individual subject, maximum likelihood estimation of the power law exponents were performed over the range of values corresponding to the thick black line using the Powerlaw Python package (Alstott et al., 2014).

280 and duration distributions for all individual subjects. Both distributions show little  
 281 variability across subjects, and follow a power law with exponents  $\tau = 1.45 \pm 0.09$   
 282 and  $\alpha = 1.96 \pm 0.16$  (mean  $\pm$  SD), in agreement with values measured on pooled  
 283 distributions (Fig. 2). We note that this values are fully consistent with the the  
 284 values predicted within the mean-field directed percolation (MF-DP) universality  
 285 class— $3/2$  and  $2$ , respectively (Pruessner, 2012).

286 Next, we analyze the relationship between avalanche sizes and durations. Near  
 287 criticality the average avalanche size  $\langle s \rangle$  is expected to scale as a power of the duration  
 288  $T$ , namely  $\langle s \rangle \propto T^k$  (Pruessner, 2012). We find that such a power law relationship  
 289 between avalanche sizes and durations holds during sleep (Fig. 4). In particular,  
 290 we observe that, for  $T$ 's smaller than the duration corresponding to the onset of the  
 291 exponential cutoff in the distribution  $P(T)$  (Fig. 2 and 3), the average size scales  
 292 as  $\langle s \rangle \propto T^k$  with  $k \approx 2$  (Fig. 4). For larger durations, we observe a crossover to

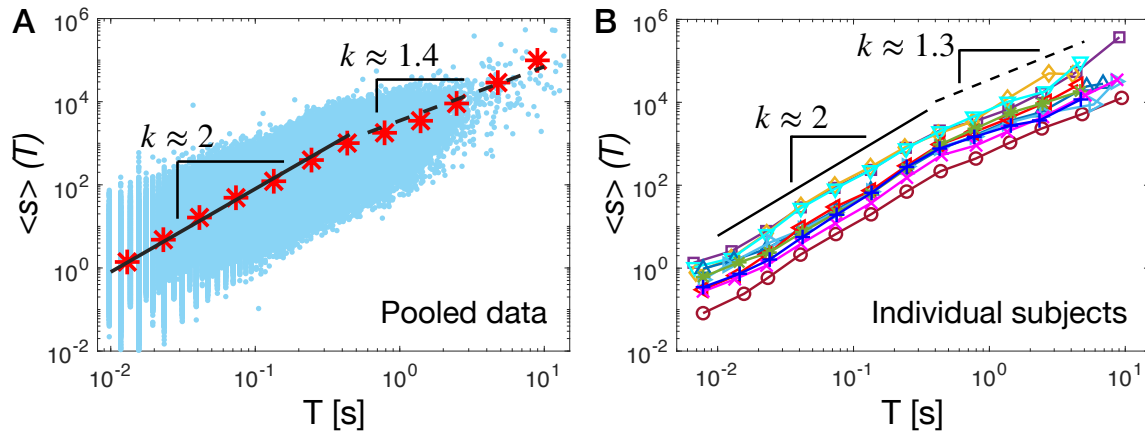

Figure 4: **Avalanche sizes and durations are connected by the scaling relationship  $\langle s \rangle \propto T^k$  consistent with underlying criticality.** (A) Average avalanche size as a function of the avalanche duration  $T$  (red stars; pooled data, 10 subjects). The average avalanche size scales as  $\langle s \rangle(T) \propto T^k$  with  $k = 1.89$  for  $T$ 's within the scaling regime of the distribution  $P(T)$ . This power-law regime is followed by a crossover to a power-law with a significantly smaller exponent  $k = 1.4$  for larger  $T$ 's. The thick black line is a power law fit for  $0.01 < T < 0.4$  s; dashed black line is a power law fit for  $0.4 < T \le 5$ . Blue dots: (s,T) scatter plot. (B) Average avalanche size as a function of the avalanche duration  $T$  for all individual subjects. The relationship between avalanche sizes and durations is consistent across subjects, showing a crossover from an exponent  $k = 1.96 \pm 0.13$ , and  $k_1 = 1.32 \pm 0.19$  (mean  $\pm$  SD).

293 a power law relationship with a smaller exponent  $k \approx 1.3$  (Fig. 4). Importantly,  
 294 the exponent  $k$  is robust and independent of the threshold  $\theta$  used to detect neuronal  
 295 avalanches (Fig. S1). Moreover, we observe that the relation  $\langle s \rangle \propto T^k$  is consistent  
 296 across individual subjects (Fig. 4B), the exponent  $k$  showing little variability across  
 297 subjects. Specifically, we find  $k = 1.96 \pm 0.13$  (mean  $\pm$  SD) for  $T$ 's smaller than  
 298 the duration corresponding to the onset of the exponential cutoff in the distribution  
 299  $P(T)$ , and  $k = 1.32 \pm 0.19$  (mean  $\pm$  SD) for larger  $T$ 's (Fig. 4B).

Notably, we find that the exponent  $k$  measured in Fig. 4 is in agreement, within errors, with the value predicted by the scaling relation

$$k = \frac{\alpha - 1}{\tau - 1} \quad (3)$$

300 in the context of crackling noise (Sethna et al., 2001). Indeed, we have that  $\frac{\alpha-1}{\tau-1} =$



301  $2.13 \pm 0.26$  (mean  $\pm$  std error), and  $k = 1.96 \pm 0.04$  (mean  $\pm$  std error). The scaling  
302 relation in Eq. 3 has a general validity in avalanche dynamics, as shown in (Scarpetta  
303 et al., 2018; Fosque et al., 2021), where Eq. 3 was derived with the only hypothesis  
304 that  $P(s) \propto s^{-\tau}$  and  $P(T) \propto T^{-\alpha}$ , and that the size fluctuations for fixed durations  
305 are small and can be neglected.

306 In sum, during sleep, the values of the critical exponents  $\tau$ ,  $\alpha$  and  $k$  are very close  
307 to the ones predicted for the critical branching process, i.e. the mean field directed  
308 percolation (MF-DP) universality class, with exponents  $\tau = 3/2$  for the size and  
309  $\alpha = 2$  for the duration distribution, and  $k = 2$  (Pruessner, 2012).

## 310 **3.2 Avalanche dynamics and sleep macro-architecture**

311 We have shown that, during sleep, neuronal avalanches are characterized by a robust  
312 scaling behavior in their size and duration distributions (Fig. 2 and 3), and that  
313 avalanche size and duration are linked by precise scaling relationships (Eq. 3 and  
314 Fig. 4). These observations are robust and consistent across subjects, and indicate  
315 underlying tuning to criticality during sleep. Next, we investigate the relationship  
316 between critical avalanche dynamics, sleep stages, and sleep stage transitions.

317 We first characterize sleep macro-architecture across all subjects. The main sleep  
318 parameters are described in Table 1 (macro-structural measures). The average TST  
319 across the 10 subjects was 423.9 min, with a mean SE of 88.92%. Around 56% of  
320 TST was spent in light sleep ( $N1 = 7.23\%$ ,  $N2 = 48.47\%$ ), 23.99% in deep sleep ( $N3$   
321  $= 23.99\%$ ), and 20.30% in REM.

322 To study the interplay between sleep macro-architecture and avalanche dynamics,

| <b>Measure</b>             | <b>MEAN</b> | <b>SD</b> |
|----------------------------|-------------|-----------|
| <b>Sleep latency (min)</b> | 9,90        | 12,25     |
| <b>SE (%)</b>              | 88,92       | 9,28      |
| <b>TST (min)</b>           | 423,90      | 63,31     |
| <b>WASO (min)</b>          | 40,97       | 30,46     |
| <b>Stage N1 (min)</b>      | 28,75       | 17,47     |
| <b>Stage N1 (%)</b>        | 7,23        | 5,20      |
| <b>Stage N2 (min)</b>      | 207,10      | 50,78     |
| <b>Stage N2(%)</b>         | 48,47       | 6,67      |
| <b>Stage N3 (min)</b>      | 99,35       | 13,40     |
| <b>Stage N3(%)</b>         | 23,99       | 4,90      |
| <b>NREM sleep (min)</b>    | 335,20      | 41,67     |
| <b>REM sleep (min)</b>     | 88,65       | 32,02     |
| <b>REM sleep (%)</b>       | 20,30       | 5,14      |

Table 1: Average characteristics of sleep macro-architecture across the analyzed subjects ( $n = 10$ ). For each measure mean and standard deviation (SD) are reported. SE = sleep efficiency (SE), TST= total sleep time, WASO = Wake After Sleep Onset.

we introduce the avalanche density,  $F_{av}(t)$ , defined as the amount of time occupied by avalanches in a sliding window of length  $u_0$  (Materials and Methods), and study the temporal evolution of  $F_{av}(t)$  in relation to the sleep macro-architecture. In the following we fix  $u_0 = 10$  s, which approximately corresponds to the largest avalanche duration we observed (Fig. 2 and 3). In Fig. 5A we show the avalanche density  $F_{av}(t)$  as a function of time for an individual subject, together with the corresponding hypnogram. We observe that  $F_{av}(t)$  gradually increases in parallel with sleep deepening, i.e. going from REM to N1, N2, and finally N3:  $F_{av}$  is very small during stage N1, reaches an intermediate value during stage N2, and increases substantially during stage N3, where it peaks slightly before the following transition back to N2 and REM (Fig. 5A). Although the avalanche density tends to decrease across the night and is, on average, much smaller at the end of the night, we find that this trend repeats throughout the night in correspondence to the descending REM  $\rightarrow$  N3 of the NREM-REM sleep cycle. In contrast to this gradually increasing trend, we

337 observe that the avalanche density decreases rather abruptly with transitions from  
338 N3 to N2 and N1—the ascending phase of the NREM-REM sleep cycle. In sum, we  
339 find that the avalanche density gradually increases during the descending slope of  
340 each sleep cycle, whilst it rapidly decreases in the ascending slope of the same cycles  
341 that precedes the onset of REM sleep (Fig. 5A).

342 Our analysis shows that the density of avalanches is significantly higher during  
343 N3 as compared to N2, N1, and REM (Fig. 5B, C). The analysis of the Pearson  
344 correlation coefficient  $\rho_{x,y}$  (Materials and Methods, Eq. 2) shows that avalanche  
345 occurrence, on average, is positively correlated with N3, while it is either weakly or  
346 slightly negatively correlated with other sleep stages (Fig. 5D). Finally, we observe  
347 that, during N3, the avalanche density tends to increase with time (Fig. 5A). This  
348 suggests that the mechanisms related to generation of neuronal avalanches become  
349 more and more effective during SWS, and move the system towards the deepest  
350 phase of sleep.

351 Importantly, we notice that the avalanche density peak—typically located within  
352 N3 periods—is higher in the first half of the night, progressively decreases during the  
353 second half of the night. To quantify the significance of this behavior with respect  
354 to the characteristics of neuronal avalanches, we compare the avalanche density, as  
355 well as avalanche size and duration distributions, in the first and last N3 stage of  
356 the sleep recordings. We find that avalanche size and duration distributions in the  
357 first N3 are comparable to the distributions calculated in the last N3 (SI, Fig. S2).  
358 Furthermore, the scaling relation  $\langle s \rangle \propto T^k$  between avalanche size and duration is  
359 satisfied both in the first and last N3, with the same values of the exponent  $k$  (SI,

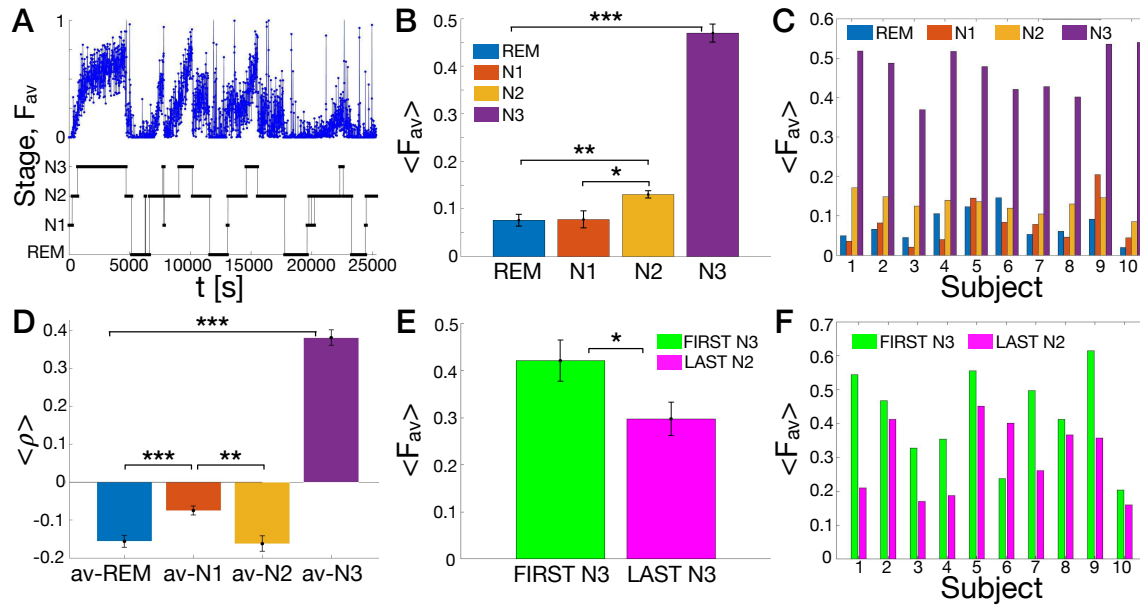

**Figure 5: Overnight sleep macro-architecture is associated with strong modulation of avalanche dynamics.** (A) The density of avalanches (blue dots),  $F_{av}(t)$ , is shown as a function of time, together with the corresponding sleep stages and sleep stage transitions (REM, N1, N2, N3 black line) for an individual subject.  $F_{av}(t)$  increases gradually in N2 and N3, and then abruptly decreases when transitioning from N3 to either N2, N1 or REM. Waking periods during sleep have been removed. (B) Mean avalanche density for each sleep stage (REM, N1, N2, N3) averaged across subjects. The density  $F_{av}(t)$  is highest in N3 and gradually decreases for N2, N1, and REM. Differences between N3 and all other sleep stages are significant (N3 versus N2:  $p = 1.7 \cdot 10^{-9}$ ; N3 versus N1:  $p = 1.5 \cdot 10^{-11}$ ; N3 versus REM:  $p = 1.6 \cdot 10^{-11}$ ).  $F_{av}$  in N2 is significantly different from the density in N1 ( $p = 0.019$ ) and REM ( $p = 0.002$ ). (C) Mean avalanche density for each sleep stage and for each individual subject. The behavior observed for the group average is consistent across individual subject, N3 being the sleep stage with the highest density of avalanches. (D) The mean Pearson correlation coefficients  $\rho_{x,y}$  (see Eq. (2)) between avalanche occurrence and sleep macro-architecture (namely REM,N1,N2,N3) shows that avalanches tend to occur mostly during N3. In all bar plots error bars indicate the standard error of mean. Differences between N3 and all other sleep stages are significant (N3 versus N2:  $p = 2.7 \cdot 10^{-13}$ ; N3 versus N1:  $p = 8.7 \cdot 10^{-12}$ ; N3 versus REM:  $p = 1.7 \cdot 10^{-13}$ ). N2 is significantly different from N1 ( $p = 0.002$ ), and N1 is significantly different from REM ( $p = 0.0006$ ). (E) Mean density of avalanches in the first and last N3 stage of the recordings averaged over all subjects. We observe that the density is significantly higher during the first N3 ( $p = 0.04$ ). (F) Avalanche density in the first N3 (blue) and last N3 (red) for each individual subject. The density is higher in the first N3 for all subjects but the subject #6, for which we observe that the density is higher in the last N3. Such deviation from the average behavior may be related to general differences we observed in sleep of subject #6. For instance, this subject presented an unusually short duration of the N3 stage at the beginning of the night, followed by a gradual increase of N3 in the second half of the sleep. Significance legend: \*\*\* for  $p < 0.001$ ; \*\* for  $p < 0.01$ ; \* for  $p < 0.05$ . The \*\*\* in panel B and D refers to the pairwise comparison between N3 and all the other sleep stages. The \*\* in panel B refers to the pairwise comparison between N2, N1, and REM. Differences are not significant where no stars are reported.

360 Fig. S1). On the other hand, we observe that the avalanche density is significantly  
 361 higher during the first N3 as compared to the last N3 (Fig. 5E, F) ( $t$ -test:  $p = 0.04$ ).  
 362 This is consistent across subjects (Fig. 5F), with only one exception (subject #6,

363 Fig. 5F).

### 364 **3.3 Avalanche dynamics and sleep micro-architecture**

365 The analysis of the avalanche density across sleep stages has shown that neuronal  
366 avalanches tend to occur with higher frequency during NREM sleep. However,  
367 NREM sleep has a complex micro-architecture that is characterized by the CAP  
368 phenomenon (Terzano et al., 2002). In our data, the mean CAP rate was 49.19%  
369 with the following distribution across NREM stages: N1= 41.69%, N2= 48.36%,  
370 and N3= 53.37% (Table 2). On average, subjects presented 37.1 CAP sequences per  
371 night, with a mean duration of 4.55 min. With respect to CAP subtypes distribution,  
372 206 were A1 (25.7% of the CAP time); 67.2 were A2 (9.2% of the CAP time), and  
373 83.8 were A3 (14.19% of the CAP time). A1's were more present during stage N3  
374 (50.21%) as compared to N2 (5.72%) and N1 (1.49%), in agreement with previous  
375 studies (Halász et al., 2004). On the other hand, subtypes A2 and A3 predominated  
376 in stage N1 (particularly A3, 37,77%) and N2 (14.39% for A2 and 17.46% for A3) 2.

377 To dissect the relationship between CAP and occurrence of neuronal avalanches  
378 during NREM sleep, we compare the time course of the avalanche density with the  
379 density of distinct CAP phases (Fig. 6A) defined as  $F_X(t) = (u_X(t))/u_0$ , where X  
380 denotes the specific CAP phase—A, A1, A2, A3, B—and  $u_X(t)$  the time occupied by  
381 the specific CAP phase in a window of length  $u_0 = 10$  s. We observe a remarkable  
382 time correspondence between the temporal profile of the density of avalanches  $F_{av}(t)$   
383 and the density of CAP, with the peaks in avalanche density corresponding to high  
384 density of CAP—in particular phase A and A1 (Fig. 6A). Specifically, we notice

| <b>Measure</b>                    | <b>MEAN</b> | <b>SD</b> |
|-----------------------------------|-------------|-----------|
| <b>CAP time (minutes)</b>         | 162,51      | 42,3      |
| <b>CAP rate (%)</b>               | 49,05       | 14,4      |
| <b>CAP sequences (n)</b>          | 37,1        | 8,3       |
| <b>CAP sequences length (min)</b> | 4,55        | 1,6       |
| <b>CAP cycle (n)</b>              | 357,6       | 104,1     |
| <b>Phase A length (s)</b>         | 8,59        | 1,4       |
| <b>Phase B length (s)</b>         | 20,67       | 3,5       |
| <b>Phase A1 (n)</b>               | 206         | 86,9      |
| <b>Phase A2 (n)</b>               | 67,2        | 39,2      |
| <b>Phase A3 (n)</b>               | 83,8        | 34,9      |
| <b>CAP A1 Rate (%)</b>            | 25,7        | 11,7      |
| <b>CAP A2 Rate (%)</b>            | 9,2         | 5,8       |
| <b>CAP A3 Rate (%)</b>            | 14,19       | 7,4       |
| <b>CAP Rate N1 (%)</b>            | 41,69       | 17,3      |
| <b>CAP Rate N2 (%)</b>            | 48,36       | 19,3      |
| <b>CAP Rate N3 (%)</b>            | 53,37       | 18,8      |
| <b>CAP A1 N1 (%)</b>              | 1,75        | 3,0       |
| <b>CAP A1 N2 (%)</b>              | 16,9        | 12,2      |
| <b>CAP A1 N3 (%)</b>              | 50,21       | 19,5      |
| <b>CAP A2 N1 (%)</b>              | 2,37        | 3,1       |
| <b>CAP A2 N2 (%)</b>              | 14,39       | 9,4       |
| <b>CAP A2 N3 (%)</b>              | 5,72        | 2,1       |
| <b>CAP A3 N1 (%)</b>              | 37,77       | 17,9      |
| <b>CAP A3 N2 (%)</b>              | 17,46       | 9,4       |
| <b>CAP A3 N3 (%)</b>              | 1,49        | 1,7       |
| <b>Subtype A1 duration (s)</b>    | 6,42        | 2,0       |
| <b>Subtype A2 duration (s)</b>    | 8,63        | 2,0       |
| <b>Subtype A3 duration (s)</b>    | 12,72       | 1,32      |

Table 2: Average characteristics of sleep micro-architecture across the analyzed subjects (n = 10).

385 that, with sleep deepening, the progressive increase of CAP density is accompanied  
386 by a parallel increase in avalanche density. We find that the percentage of phase  
387 A occupied by neuronal avalanches is about 42.16%, while the percentage of sleep  
388 time occupied by avalanches is 19,21% (Materials and Methods). Interestingly, CAP  
389 phase A1 is even richer in avalanches compared to CAP A phases A2 and A3 (53,32%  
390 versus 43,84% and 27,72%, respectively).

391 The physiological increase of CAP cycles during N2 and N3, indirectly leads to a  
392 reduction of time occupied by NCAP sleep. Furthermore, during the deepest stages  
393 of NREM sleep, CAP's typically present shorter phases B. These changes in the sleep

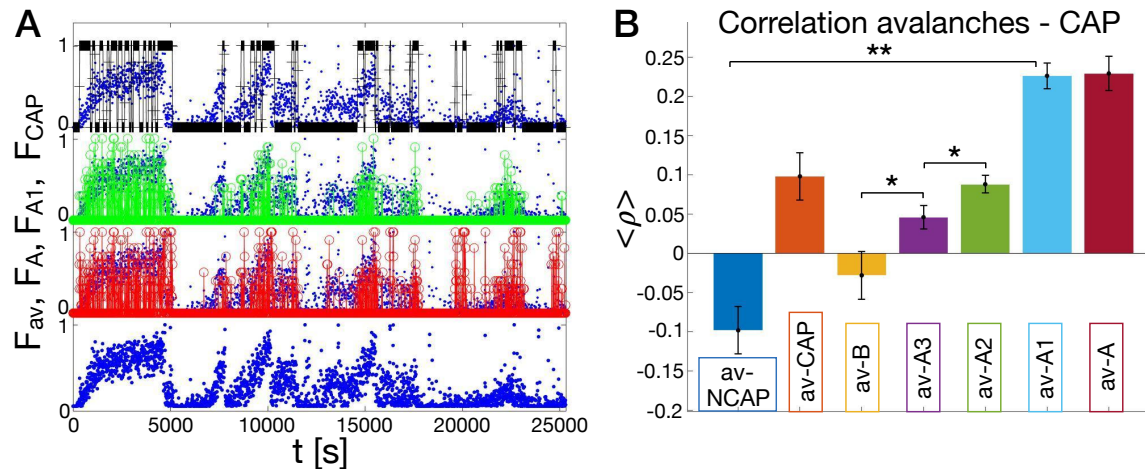

**Figure 6: Occurrence of neuronal avalanches is coupled with the occurrence of the CAP.** (A) Density of avalanches versus density of CAP phases as function of time for an individual subject. Density of avalanches in blue, density of phase A in red, density of phase A1 in green, density of CAP in black. (B) The mean Pearson correlation coefficients  $\rho(x, y)$  (average over subjects; see Materials and Methods, Eq. (2)) between avalanche occurrence and micro-architecture features (NCAP, CAP, B, A, and A subtypes A3,A2,A1). Error bars indicate the standard error of the mean. Differences are all significant ( $p < 0.01$  for all couples except av-B versus av-A3 and av-A2 versus av-A3) but av-CAP versus av-A3 and av-A2, av-A versus av-A1, and av-NCAP versus av-B. Significance legend: \*\*\* for  $p < 0.001$ ; \*\* for  $p < 0.01$ ; \* for  $p < 0.05$ . The \*\* in panel B refers to the pairwise comparison between av-A1 and all the other bars but av-A. Differences are not significant where no stars are reported.

394 micro-dynamics lastly sustain the observed increase of avalanche density.

395 Next, we measure the Pearson correlation coefficients between occurrence of neu-  
 396 ronical avalanches and different CAP phases (see Materials and Methods, Eq. 2). We  
 397 find positive correlations between occurrence of avalanches and CAP phase A, in par-  
 398 ticular CAP phase A1 (Fig. 6B). On the contrary, we observe negative correlations  
 399 between occurrence of avalanches, CAP phase B, NCAP periods. This indicates that  
 400 the occurrence of avalanches during NREM sleep is strictly related to occurrence of  
 401 CAP, and in particular CAP phase A1. These results are consistent across subjects,  
 402 as shown in Table 3.

| Subject          | av-NCAP | av-CAP | av-B   | av-A3  | av-A2 | av-A1 | av-A  |
|------------------|---------|--------|--------|--------|-------|-------|-------|
| #1               | -0,240  | 0,240  | 0,113  | 0,050  | 0,080 | 0,270 | 0,260 |
| #2               | -0,140  | 0,140  | -0,016 | 0,130  | 0,150 | 0,220 | 0,290 |
| #3               | -0,060  | 0,060  | -0,041 | 0,090  | 0,090 | 0,170 | 0,190 |
| #4               | -0,140  | 0,140  | 0,039  | 0,010  | 0,110 | 0,230 | 0,190 |
| #5               | -0,040  | 0,040  | -0,013 | 0,000  | 0,050 | 0,190 | 0,130 |
| #6               | -0,020  | 0,020  | -0,206 | 0,040  | 0,090 | 0,250 | 0,270 |
| #7               | -0,070  | 0,070  | -0,074 | 0,080  | 0,110 | 0,200 | 0,240 |
| #8               | -0,220  | 0,220  | 0,056  | 0,040  | 0,110 | 0,330 | 0,340 |
| #9               | -0,140  | 0,140  | 0,016  | 0,050  | 0,060 | 0,240 | 0,230 |
| #10              | 0,080   | -0,080 | -0,158 | -0,030 | 0,030 | 0,160 | 0,130 |
| <b>Mean</b>      | -0,099  | 0,099  | -0,029 | 0,046  | 0,088 | 0,226 | 0,227 |
| <b>Std error</b> | 0,030   | 0,030  | 0,097  | 0,219  | 0,016 | 0,011 | 0,015 |

Table 3: Pearson correlation coefficient between avalanche occurrence and CAP subtypes for the analyzed individual subjects ( $n = 10$ ) (Materials and Methods).

## 403 4 Discussion

404 In this paper we analyzed the scaling properties of neuronal avalanches during sleep  
405 in healthy volunteers, and investigated the relationship between avalanche dynam-  
406 ics and sleep macro- and micro-architecture, with a particular focus on the cyclic  
407 alternating patterns (CAP). We showed that the scaling exponents characterizing  
408 neuronal avalanches are consistent with the MF-DP universality class, and obey the  
409 scaling relations theoretically predicted. This indicates that, during physiological  
410 sleep, brain dynamics is consistent with criticality and is satisfactorily described by  
411 the MF-DP universality class. Furthermore, we introduced a measure—the density  
412 of avalanches—to quantify the relationship between avalanche dynamics and sleep  
413 macro- and micro-architecture. Our analysis showed that distributions of avalanches  
414 in time is not random but closely follow the descending and ascending phase of



415 the NREM-REM cycles. Within such cycles, the presence of neuronal avalanches is  
416 linked to the occurrence of CAP during NREM sleep. Specifically, we found that the  
417 density of avalanches is higher during NREM, and, within NREM sleep, avalanche  
418 occurrence is positively correlated with the phase A of the CAP, in particular the  
419 phase A1. This suggests a close relationship between modulation and control of brain  
420 criticality, sleep macro- and micro-architecture, and brain function, which we discuss  
421 in turn.

## 422 **Brain dynamics and criticality during sleep**

423 Empirical evidence indicates that the human brain operates close to a critical regime  
424 both in resting wakefulness and during sleep (Priesemann et al., 2013; Bocaccio  
425 et al., 2019; Allegrini et al., 2015; Lombardi et al., 2021b, 2020a; Wang et al., 2019).  
426 In particular, recent studies suggest that criticality plays a key role in determining  
427 the temporal organization of sleep stage and arousal transitions (Lombardi et al.,  
428 2020a; Wang et al., 2019). However, critical dynamics during sleep remains poorly  
429 understood. In this respect, a key open question concerns the universality class to  
430 which brain criticality obeyed during sleep. To the best of our knowledge, this is  
431 the first study investigating this problem, and exploring the scaling relation among  
432 critical exponents of neuronal avalanches during sleep. We reported a picture that  
433 is fully consistent with the MF-DP universality class. Indeed, we have shown that  
434 (i) the critical exponents for the avalanche size and duration distributions are very  
435 close to the prediction of the critical branching process, MF-DP universality class,  
436 i.e.  $\tau = 3/2$ ,  $\alpha = 2$ , respectively; (ii) the exponent  $k$  connecting sizes and durations

437 is very close to 2, as predicted; (iii) the exponents  $\tau$ ,  $\alpha$ , and  $k$  correctly satisfy the  
438 expected scaling relation.

439 The exponent  $k$  has been previously measured in the awake resting-state, from  
440 Zebrafish and rats to monkeys and humans (Ponce-Alvarez et al., 2018; Miller et al.,  
441 2019; Fontenele et al., 2019; Lombardi et al., 2021a; Mariani et al., 2021; Dalla Porta  
442 and Copelli, 2019). In line with our findings, Miller et al. (Miller et al., 2019)  
443 found that, in awake monkeys,  $k \simeq 2$  in the range corresponding to the power law  
444 regime of the size and duration distributions, while  $k \simeq 1 - 1.5$  in the region that  
445 corresponds to the exponential cut-off of the distributions—where we found  $k \approx 1.3$ .  
446 Similar results were found in Zebrafish (Ponce-Alvarez et al., 2018). Deviation from  
447 the value  $k = 2$  was observed in the resting-state of the human brain (Lombardi  
448 et al., 2021a), in ex-vivo turtle visual cortex (Shew et al., 2015), in the barrel cortex  
449 of anesthetized rats (Mariani et al., 2021), in cortex slice cultures (Friedman et al.,  
450 2012), and in freely behaving and anesthetized rats (Fontenele et al., 2019). Notably,  
451 a recent work (Apicella et al., 2022) has shown that, in a 2D neural network, the  
452 value of the exponent  $k$  is related to the network connectivity, with  $k \simeq 1.3$  for a  
453 2D connectivity, and  $k = 2$  when the mean-field approximation is justified, namely  
454 when the spatial extension can be considered small as compared to the system's  
455 connectivity range. This suggests that the crossover observed in  $S(T)$  (Fig. 4) from  
456  $k \simeq 2$  to  $k \simeq 1.3$  could be due to the different nature of small, localized avalanches,  
457 which propagate over a densely connected network, and larger avalanches, which rely  
458 on the structured topology of large scale brain networks with sparser and long-range  
459 connections. Subsampling in brain activity recordings has also been suggested as a

460 potential origin of the observed scaling exponents (Carvalho et al., 2021).

## 461 **Neuronal avalanches and sleep macro-architecture**

462 The static properties of neuronal avalanches during sleep, i.e. size and duration dis-  
463 tributions, have been investigated in previous studies. Analyses of scalp EEG and  
464 human intracranial depth recordings showed that such distributions follow a simi-  
465 lar power law behavior across the sleep-wake cycle, with exponents in line with our  
466 observations (Allegrini et al., 2015; Priesemann et al., 2013). Similarly, the analy-  
467 sis of whole-brain fMRI data confirmed a robust critical (or near-critical) behavior  
468 from wakefulness to deep sleep, with little differences in the power-law exponent  
469 of the avalanche size distribution (in particular between wakefulness and stage N2)  
470 (Bocaccio et al., 2019).

471 On the other hand, here we have shown that, although the static properties  
472 remain fairly stable across different sleep stages (Bocaccio et al., 2019; Allegrini et al.,  
473 2015; Priesemann et al., 2013), avalanche dynamics is modulated by the ascending  
474 and descending slope of the NREM-REM sleep cycles. By analyzing the temporal  
475 evolution of the avalanche density, we found that avalanche occurrence markedly  
476 and progressively increases with NREM sleep stages N2 and N3 and, specifically,  
477 during periods of sleep deepening (descending slope of sleep cycles), in parallel with  
478 the increase of SWA. On the contrary, the abrupt decrease in avalanche density  
479 during the ascending slope of sleep cycles suggests a negative influence from REM-  
480 on/wakefulness circuits with respect to their appearance. The different behavior of  
481 avalanche density during the descending and ascending slopes of the sleep cycles was

482 not previously observed, despite the crucial role of such dynamics for sleep regulation.  
483 In terms of sleep physiology, the descending and ascending slopes of sleep cycles are  
484 markedly different: during the descending slope, sleep-promoting forces are stronger,  
485 the thalamo-cortical system works in the burst-firing mode and brainstem cholinergic  
486 pathways are tonically repressed. Conversely, during the ascending slope, the NREM  
487 driving forces become weaker, sleep is more vulnerable towards pro-arousal intrusions  
488 and REM-promoting outputs prevail (Halász et al., 2004). Taking this into account,  
489 our results suggest that avalanche occurrence is not random across the sleep cycles,  
490 but instead contributes to define and sustain the dynamical interplay between sleep-  
491 wake promoting networks.

## 492 **Avalanches and sleep micro-architecture**

493 Sleep architecture is composed of numerous oscillatory patterns, including, above  
494 all, the CAP (Terzano et al., 2000). CAP's occur on time scales of seconds or  
495 minutes, accompany sleep stage shifts, and contribute to the organization of sleep  
496 cycles. The CAP is a periodic EEG activity that reflects a state of brain instability,  
497 and is characterized by the alternation of phases of higher EEG amplitude (CAP  
498 phases A, “activation phases”) separated by periods of lower EEG amplitude (CAP  
499 phases B, “de-activation phases”)—both phases lasting between 2 and 60 seconds.  
500 Conversely, the NCAP is defined as a period of sustained physiologic stability. CAP  
501 phases A can be further subdivided into three subtypes: A1, A2 and A3. Isolated  
502 A1 phases, not followed by a subsequent phase A within 60 seconds, are scored as  
503 NCAP, confirming that the dynamic interplay between phases of activation/baseline

504 is key characteristic of the CAP framework.

505 Our analyses demonstrated positive correlations between CAP and avalanche  
506 occurrence, and negative correlations for NCAP sleep. Such link suggests a close  
507 relationship between CAP and brain tuning to criticality during sleep, a key aspect  
508 that should be further investigated in future work.

509 Although the definition of avalanches (large, collective non-gaussian fluctuations  
510 of brain activity) is not related to the definition of CAP phase A, our results show  
511 that neuronal avalanches are correlated with the occurrence of CAP phase A. In  
512 particular, we observed stronger correlations between avalanche occurrence and the  
513 CAP A1 subtype, and weaker positive correlation with subtypes A2 and A3. Inter-  
514 estingly, the correlation between avalanches and the phase A of the CAP is more  
515 prominent than the correlation with the CAP itself— phase A and phase B together.  
516 We speculate that this could be due to the opposite significance of CAP phase A  
517 and B with respect to sleep dynamics. Electrophysiologically the phase B is char-  
518 acterized by the rebound of background EEG activity after the strong ‘activation’  
519 driven by the phase A. Compared to phase A, the phase B could be described as  
520 “lower arousal reaction” or vehicles of deactivation (Parrino et al., 2012). Impor-  
521 tantly, we did not observe significant correlation between avalanche occurrence and  
522 phase B, corroborating our assumption about the relationship between CAP phase A  
523 and avalanches. The prominent correlation between avalanche occurrence and CAP  
524 “activation phase” A1 may suggest that neuronal avalanches emerge at the edge of  
525 a synchronization phase transition, as recent numerical studies indicate (Di Santo  
526 et al., 2018; Scarpetta and de Candia, 2014; Scarpetta et al., 2013).

527 Finally, we note that CAP-A1 physiologically prevail in the first half of the night  
528 and during the descending slope of each sleep cycle, boosting or maintaining SWS.  
529 Similarly, the avalanche density decreases moving from the first to the last sleep  
530 cycle. Hence, both CAP phase A and neuronal avalanches follow a physiological,  
531 homeostatic decay throughout the night, and they may both contribute to the build-  
532 up of the deepest stages of NREM sleep.

### 533 **Neuronal avalanches, CAP, and learning mechanisms: an in-** 534 **triguing hypothesis**

535 Sleep is crucial to renormalize synaptic weight, ensure an optimal and effective net-  
536 work state for information processing, and preserve cognition (Cirelli and Tononi,  
537 2021). Renormalization of synaptic weights taking place during sleep may serve  
538 to keep the network close to criticality (Pearlmutter and Houghton, 2009). In line  
539 with this view, the here reported higher concentration of avalanches during SWS and  
540 CAP-A1 indicate that these states may exert a pivotal role in modulating and restor-  
541 ing brain criticality. Furthermore, because CAP-A1 has been proposed to play a role  
542 in the sleep-dependent learning processes (Ferri et al., 2008), our observations point  
543 to a functional link between critical avalanche dynamics and sleep-dependent learn-  
544 ing processes, as shown in recent numerical studies (Scarpetta and de Candia, 2014;  
545 Scarpetta, 2019). Specifically, it has been demonstrated that, within the alternation  
546 of up- and down-states observed during SWS, the sequence of avalanches occurring  
547 in the up-states correspond to an intermittent reactivation of stored spatiotemporal  
548 patterns, a mechanism that is key for memory consolidation (Dupret et al., 2010).

## 549 **Conclusions and limitations of the study**

550 Overall, our findings open a novel perspective on the relationship between critical  
551 brain dynamics and physiological sleep. We provided a comprehensive account of  
552 the critical exponents and scaling relations for neuronal avalanches, demonstrating  
553 that brain dynamics during sleep follows the MF-DP universality class. This sets the  
554 bases for future investigation of neural collective behaviors occurring during sleep,  
555 including their functional role in relation to criticality. As a first step in this direc-  
556 tion, our study provides evidence of a functional link between avalanche occurrence,  
557 slow-wave sleep dynamics, sleep stage transitions and occurrence of CAP phase A  
558 during NREM sleep. As CAP is considered one of the major guardians of NREM  
559 sleep that allows the brain to react dynamically to any external perturbation and  
560 contributes to the cognitive consolidation processes occurring in sleep, our observa-  
561 tions suggest that neuronal avalanches at criticality might be associated with flexible  
562 response to external inputs and to cognitive processes—a key assumption of the crit-  
563 ical brain hypothesis. This is a crucial aspect that should be investigated in future  
564 work. Moreover, based on our results, one could speculate that a relationship between  
565 occurrence of neuronal avalanches and physiological sleep measures exists. To ad-  
566 dress this point, additional studies in pathological sleep conditions where both CAP  
567 and criticality-based metrics show a deviation from the physiological parameters are  
568 needed (Parrino and Vaudano, 2017; Zimmern, 2020). Future work should also over-  
569 come some limitations we acknowledge in the current study. The limited number of  
570 subjects and the use of scalp EEG (we enrolled healthy volunteers for which more  
571 invasive techniques are not allowed), which limits the analysis of collective neural

572 dynamics



# 573 **Supplementary Information**

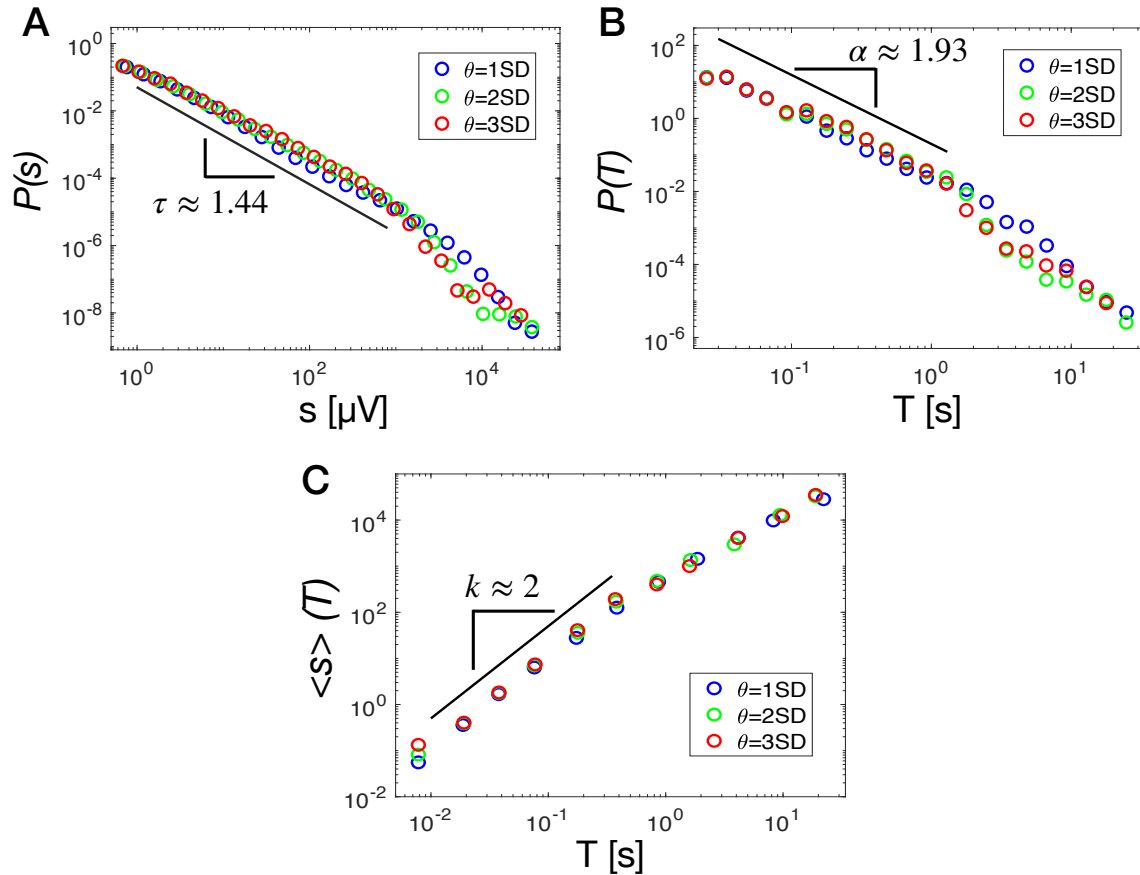

Fig. S1: Avalanche size (A) and duration distribution (B) for an individual subject and for different values of the threshold  $\theta$  used to identify neuronal avalanches (Materials and Methods) (blue tick line:  $\theta = 1\text{SD}$ ; green tick line:  $\theta = 2\text{SD}$ ; red tick line =  $\theta = 3\text{SD}$ ). The dotted black line is the power law fit for  $\theta = 2\text{SD}$ . The average size as a function of the duration (C) follows the power law relationship  $\langle s \rangle \propto T^k$  with  $k = 2$  (black thick line) for all threshold values and for  $T$ 's smaller than the onset of the exponential cut-off of the duration distribution  $P(T)$ . For larger  $T$ 's  $k = 1.3$ .

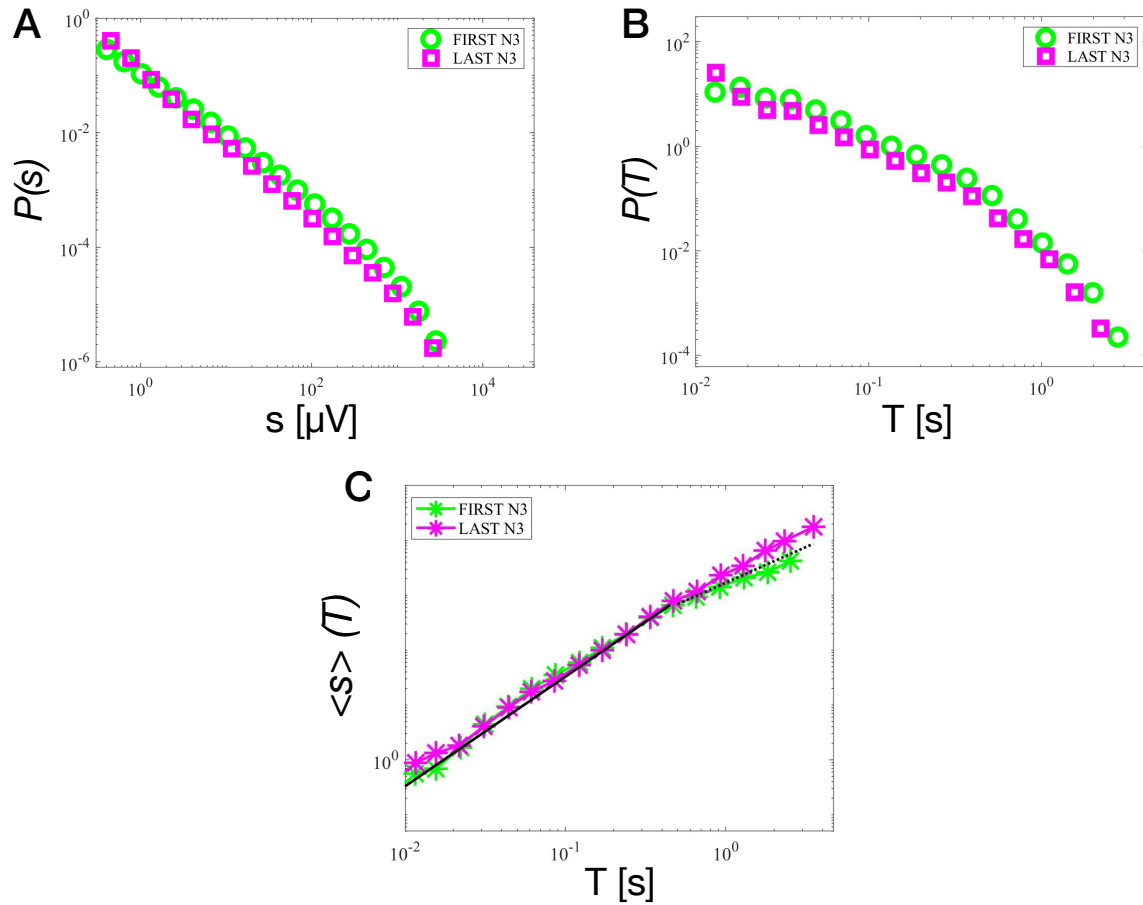

Fig. S2: Distribution of size (A) and duration (B) for avalanches in the FIRST N3 (green) and the LAST N3 (magenta), and (C) average size as a function of the duration for avalanches in the FIRST N3 (green) and in the LAST N3 (magenta). Both the distributions and the relationship between average avalanche size and avalanche durations remain stable when moving from the FIRST N3 to the LAST N3.

## 574 References

- 575 Allegrini, P, Paradisi, P, Menicucci, D, Laurino, M, Piarulli, A, and Gemignani, A.  
576 Self-organized dynamical complexity in human wakefulness and sleep: different  
577 critical brain-activity feedback for conscious and unconscious states. *Phys. Rev.*  
578 *E*, 92(3):032808, 2015.
- 579 Alstott, J, Bullmore, E, and Plenz, D. powerlaw: a python package for analysis of  
580 heavy-tailed distributions. *PloS one*, 9(1):e85777, 2014.
- 581 Apicella, I, Scarpetta, S, de Arcangelis, L, Sarracino, A, and de Candia, A. Power  
582 spectrum and critical exponents in the 2d stochastic wilson cowan model. *BioRxiv*,  
583 2022.07.04.498640, 2022. doi: 10.1101/2022.07.04.498640.
- 584 Aricò, D, Drago, V, Foster, P. S, Heilman, K. M, Williamson, J, and Ferri, R. Effects  
585 of nrem sleep instability on cognitive processing. *Sleep Medicine*, 11(8):791–798,  
586 2010.
- 587 Bak, P. *How nature works:the science of self-organized criticality*. Copernicus Press,  
588 1996.
- 589 Beggs, J. M and Plenz, D. Neuronal avalanches in neocortical circuits. *J. Neurosci.*,  
590 23:11167–11177, 2003.
- 591 Berry, R. B, Brooks, R, Gamaldo, C, Harding, S. M, Lloyd, R. M, Quan, S. F,  
592 Troester, M. T, and Vaughn, B. V. Aasm scoring manual updates for 2017 (version  
593 2.4). *J Clin Sleep Med.*, 13:665–666, 2017.
- 594 Bocaccio, H, Pallavicini, C, Castro, M. N, Sánchez, S. M, De Pino, G, Laufs, H,  
595 Villarreal, M. F, and Tagliazucchi, E. The avalanche-like behaviour of large-scale  
596 haemodynamic activity from wakefulness to deep sleep. *Journal of the Royal So-*  
597 *ciety Interface*, 16(158):20190262, 2019.
- 598 Brown, R. E, Basheer, R, McKenna, J. T, Strecker, R. E, and McCarley, R. W.  
599 Control of sleep and wakefulness. *Physiol. Rev.*, 92:1087–1187, 2012.
- 600 Carvalho, T. T. A, Fontenele, A. J, Girardi-Schappo, M, Feliciano, T, Aguiar, L.  
601 A. A, Silva, T. P. L, de Vasconcelos, N. A. P, Carelli, P. V, and Copelli, M.  
602 Subsampled directed-percolation models explain scaling relations experimentally  
603 observed in the brain. *Front. Neural Circuits*, 14:576727, 2021. doi: 10.3389/fn-  
604 cir.2020.576727.

- 605 Cirelli, C and Tononi, G. The why and how of sleep-dependent synaptic down-  
606 selection. In *Seminars in cell & developmental biology*. Elsevier, 2021.
- 607 Clauset, A, Shalizi, C. R, and J Newman, M. E. Power-law distributions in empirical  
608 data. *SIAM review*, 51(4):661–703, 2009.
- 609 Cragg, B. G and Temperley, H. N. The organization of neurones: a cooperative  
610 analogy. *EEG Clin. Neurophysiol.*, 6:85–92, 1954.
- 611 Crutchfield, J. P and Karl, Y. Computation at the onset of chaos. In *Complexity,*  
612 *Entropy, and Physics of Information*. Addison-Wesley, 1990.
- 613 Dalla Porta, L and Copelli, M. Modelling neuronal avalanches and long-range tem-  
614 poral correlations at the emergence of collective oscillations: Continuously varying  
615 exponents mimic m/eeg results. *Plos Comp. Biol.*, 15(4):e1006924, 2019.
- 616 Di Santo, S, Villegas, P, Burioni, R, and Muñoz, M. A. Landau–ginzburg theory  
617 of cortex dynamics: Scale-free avalanches emerge at the edge of synchronization.  
618 *Proc. Natl. Acad. Sci. USA*, 115(7):E1356–E1365, 2018.
- 619 Dupret, D, O’Neill, J, Pleydell-Bouverie, B, and Csicsvari, J. The reorganization and  
620 reactivation of hippocampal maps predict spatial memory performance. *Nature*  
621 *Neuroscience*, 13(8):995–1002, 2010.
- 622 Ferri, R, Huber, R, Aricò, D, Drago, V, Rundo, F, Ghilardi, M. F, Massimini, M, and  
623 Tononi, G. The slow-wave components of the cyclic alternating pattern (cap) have  
624 a role in sleep-related learning processes. *Neuroscience letters*, 432(3):228–231,  
625 2008.
- 626 Fontenele, A. J, de Vasconcelos, N. A, Feliciano, T, Aguiar, L. A, Soares-Cunha, C,  
627 Coimbra, B, Dalla Porta, L, Ribeiro, S, Rodrigues, A. J, Sousa, N, et al. Criticality  
628 between cortical states. *Phys. Rev. Lett.*, 122(20):208101, 2019.
- 629 Fosque, L. J, Williams-García, R. V, Beggs, J. M, and Ortiz, G. Evidence for  
630 quasicritical brain dynamics. *Phys. Rev. Lett.*, 126(9):098101, 2021.
- 631 Friedman, N, Ito, S, Brinkman, B. A. W, Shimono, M, DeVille, R. E. L, Dahmen,  
632 K. A, Beggs, J. M, and Butler, T. C. Universal critical dynamics in high resolution  
633 neuronal avalanche data. *Phys. Rev. Lett.*, 108:208102, 2012.
- 634 Halász, P, Terzano, M, Parrino, L, and Bódizs, R. The nature of arousal in sleep.  
635 *Journal of sleep research*, 13(1):1–23, 2004.

- 636 Kinouchi, O and Copelli, M. Optimal dynamical range of excitable networks at  
637 criticality. *Nature physics*, 2(5):348–351, 2006.
- 638 Linkenkaer-Hansen, K, Nikouline, V. V, Palva, J. M, and Ilmoniemi, R. J. Long-  
639 range temporal correlations and scaling behavior in human brain oscillations. *Jour-  
640 nal of Neuroscience*, 21(4):1370–1377, 2001.
- 641 Lombardi, F, Gomez-Extremera, M, Bernaola-Galvan, P, Vetrivelan, R, Saper, C. B,  
642 Scammell, T. E, and Ivanov, P. C. Critical dynamics and coupling in bursts of  
643 cortical rhythms indicate non-homeostatic mechanism for sleep-stage transitions  
644 and dual role of vlpo neurons in both sleep and wake. *J. Neurosci.*, 40(1):171–190,  
645 2020a.
- 646 Lombardi, F, Wang, J. W, Zhang, X, and Ivanov, P. Ch. Power-law correlations  
647 and coupling of active and quiet states underlie a class of complex systems with  
648 self-organization at criticality. *EPJ web of conferences*, 230:00005, 2020b.
- 649 Lombardi, F, Pepić, S, Shriki, O, Tkačik, G, and De Martino, D. Statistical modeling  
650 of adaptive neural networks explains coexistence of avalanches and oscillations in  
651 resting human brain. *arXiv:2108.06686v2*, 2021a.
- 652 Lombardi, F, Shriki, O, Herrmann, H. J, and de Arcangelis, L. Long-range temporal  
653 correlations in the broadband resting state activity of the human brain revealed  
654 by neuronal avalanches. *Neurocomputing*, 461:657–666, 2021b.
- 655 Mariani, B, Nicoletti, G, Bisio, M, Maschietto, M, Oboe, R, Leparulo, A, Suweis, S,  
656 and Vassanelli, S. Neuronal avalanches across the rat somatosensory barrel cortex  
657 and the effect of single whisker stimulation. *Front. Syst. Neurosci.*, 15, 2021.
- 658 Mazzoni, A, Broccard, F. D, Garcia-Perez, E, Bonifazi, P, M.Ruaro, E, and Torre,  
659 V. On the dynamics of the spontaneous activity in neuronal networks. *PLoS ONE*,  
660 2(5)(e439.doi):10.1371/journal.pone.0000439, 2007.
- 661 Meisel, C, Olbrich, E, Shriki, O, and Achermann, P. Fading signatures of critical  
662 brain dynamics during sustained wakefulness in humans. *J. Neurosci.*, 33(44):  
663 17363–17372, 2013.
- 664 Meisel, C, Bailey, K, Achermann, P, and Plenz, D. Decline of long-range temporal  
665 correlations in the human brain during sustained wakefulness. *Sci. Rep.*, 7(1):  
666 1–11, 2017.
- 667 Miller, S. R, Yu, S, and Plenz, D. The scale-invariant, temporal profile of neuronal  
668 avalanches in relation to cortical  $\gamma$ -oscillations. *Sci. Rep.*, 9(1):1–14, 2019.

- 669 Munoz, M. A. Colloquium: Criticality and dynamical scaling in living systems.  
670 *Reviews of Modern Physics*, 90(3):031001, 2018.
- 671 Palva, J. M, Zhigalov, A, Hirvonena, J, Korhonena, O, Linkenkaer-Hansen, K, and  
672 Palva, S. Neuronal long-range temporal correlations and avalanche dynamics are  
673 correlated with behavioral scaling laws. *Proc. Natl. Acad. Sci. USA*, 110(9):3585,  
674 2013.
- 675 Parrino, L and Vaudano, A. E. The resilient brain and the guardians of sleep: new  
676 perspectives on old assumptions. *Sleep Medicine Reviews*, 39:98–107, 2017.
- 677 Parrino, L and Vaudano, A. E. The resilient brain and the guardians of sleep: new  
678 perspectives on old assumptions. *Sleep Medicine Reviews*, 39:98–107, 2018.
- 679 Parrino, L, Spaggiari, M. C, Boselli, M, Barusi, R, and Terzano, M. G. Effects of  
680 prolonged wakefulness on cyclic alternating pattern (cap) during sleep recovery at  
681 different circadian phases. *Journal of sleep research*, 2(2):91–95, 1993.
- 682 Parrino, L, Ferri, R, Bruni, O, and Terzano, M. G. Cyclic alternating pattern (cap):  
683 the marker of sleep instability. *Sleep medicine reviews*, 16(1):27–45, 2012.
- 684 Pasquale, V, Massobrio, P, Bologna, L. L, Chiappalone, M, and Martinoia, S. Self-  
685 organization and neuronal avalanches in networks of dissociated cortical neurons.  
686 *J.Neurosci.*, 153:1354–1369, 2008.
- 687 Pearlmutter, B. A and Houghton, C. J. A new hypothesis for sleep: tuning for  
688 criticality. *Neural Comput.*, 21(6):1622–41, 2009.
- 689 Petermann, T, Thiagarajan, T. C, Lebedev, M. A, Nicolelis, M. A, Chialvo, D. R, and  
690 Plenz, D. Spontaneous cortical activity in awake monkeys composed of neuronal  
691 avalanches. *Proc. Natl. Acad. Sci. USA*, 106(37):15921–15926, 2009.
- 692 Ponce-Alvarez, A, Jouary, A, Privat, M, Deco, G, and Sumbre, G. Whole-brain  
693 neuronal activity displays crackling noise dynamics. *Neuron*, 100:1446–1459, 2018.
- 694 Priesemann, V, Valderrama, M, Wibral, M, and Le Van Quyen, M. Neuronal  
695 avalanches differ from wakefulness to deep sleep—evidence from intracranial depth  
696 recordings in humans. *PLoS computational biology*, 9(3):e1002985, 2013.
- 697 Pruessner, G. *Self-Organised Criticality: Theory, Models and Characterisation*. Cam-  
698 bridge University Press, 2012.

- 699 Scarpetta, S. Critical behavior and memory function in a model of spiking neurons  
700 with a reservoir of spatio-temporal patterns. In *The Functional Role of Critical*  
701 *Dynamics in Neural Systems*, pages 179–197. Springer, 2019.
- 702 Scarpetta, S and de Candia, A. Alternation of up and down states at a dynamical  
703 phase-transition of a neural network with spatiotemporal attractors. *Front. Syst.*  
704 *Neurosci.*, 8:88, 2014.
- 705 Scarpetta, S, Giacco, F, Lombardi, F, and Candia, A. D. Effects of poisson noise in  
706 a if model with stdp and spontaneous replay of periodic spatiotemporal patterns,  
707 in absence of cue stimulation. *Biosystems*, 112(3):258–264, 2013.
- 708 Scarpetta, S, Apicella, I, Minati, L, and de Candia, A. Hysteresis, neural avalanches,  
709 and critical behavior near a first-order transition of a spiking neural network. *Phys.*  
710 *Rev. E*, 97(6):062305, 2018.
- 711 Sethna, J. P, Dahmen, K. A, and Myers, C. R. Crackling noise. *Nature*, 410(6825):  
712 242–250, 2001.
- 713 Shew, W. L, Clawson, W. P, Pobst, J, Karimipanah, Y, Wright, N. C, and Wessel,  
714 R. Adaptation to sensory input tunes visual cortex to criticality. *Nat. Phys.*, 11  
715 (8):659–663, 2015.
- 716 Stanley, H. E. *Introduction to phase transition and critical phenomena*. Oxford Univ.  
717 Press, New York, 1971.
- 718 Tagliazucchi, E, Balenzuela, P, Fraiman, D, and Chialvo, D. R. Criticality in large-  
719 scale brain fmri dynamics unveiled by a novel point process analysis. *Frontiers in*  
720 *Physiology*, 3:15, 2012.
- 721 Terzano, M. G, Parrino, L, Boselli, M, Smerieri, A, and Spaggiari, M. C. Cap compo-  
722 nents and eeg synchronization in the first 3 sleep cycles. *Clinical Neurophysiology*,  
723 111(2):283–290, 2000.
- 724 Terzano, M. G, Parrino, L, Smerieri, A, Chervin, R, Chokroverty, S, Guilleminault,  
725 C, Hirshkowitz, M, Mahowald, M, Moldofsky, H, Rosa, A, et al. Atlas, rules, and  
726 recording techniques for the scoring of cyclic alternating pattern (cap) in human  
727 sleep. *Sleep medicine*, 3(2):187–199, 2002.
- 728 Terzano, M. G, Parrino, L, Smerieri, A, De Carli, F, Nobili, L, Donadio, S, and  
729 Ferrillo, F. Cap and arousals are involved in the homeostatic and ultradian sleep  
730 processes. *Journal of sleep research*, 14(4):359–368, 2005.



- 731 Tkačik, G, Mora, T, Marre, O, Amodei, D, Palmer, S. E, Berry, M. J, and Bialek, W.  
732 Thermodynamics and signatures of criticality in a network of neurons. *Proceedings*  
733 *of the National Academy of Sciences*, 112(37):11508–11513, 2015.
- 734 Wang, J. W. J. L, Lombardi, F, Zhang, X, Anaclet, C, and Ivanov, P. C. Non-  
735 equilibrium critical dynamics of bursts in  $\theta$  and  $\delta$  rhythms as fundamental charac-  
736 teristic of sleep and wake micro-architecture. *PLoS computational biology*, 15(11):  
737 e1007268, 2019.
- 738 Zimmern, V. Why brain criticality is clinically relevant: A scoping review. *Front.*  
739 *Neural Circuits*, 14:54, 2020. doi: 10.3389/fncir.2020.00054.
